# Supplementary material for: PEO surface-decorated silica nanocapsules and their application in in vivo imaging of zebrafish
Source: Royal Society of Chemistry journal article supplement (doi:10.1039/c2ra22472k), 2012-01-01
Supplement: c2ra22472k.pdf [file c2ra22472k.pdf]

## Supplementary data

### PEO Surface-Decorated Silica Nanocapsules and Their Application in In-Vivo Imaging of Zebrafish

Benedict You Wei Hsu,<sup>a</sup> Cathleen Teh,<sup>b</sup> Happy Tan,<sup>a</sup> Siew Yee Wong,<sup>c</sup> Yu Zhang,<sup>d</sup> Vladimir Korzh,<sup>b</sup> Xu Li<sup>\*c</sup> and John Wang<sup>\*a,d</sup>

<sup>a</sup> NUS Graduate School for Integrative Sciences and Engineering (NGS), National University of Singapore, Centre for Life Sciences (CeLS) #05-01, 28 Medical Drive Singapore 117456. E-mail: [msewangj@nus.edu.sg](mailto:msewangj@nus.edu.sg)

<sup>b</sup> Laboratory of Fish Developmental Biology, Institute of Molecular and Cell Biology (IMCB), Agency for Science, Technology and Research (A\*STAR), 61 Biopolis Drive Singapore 138673.

<sup>c</sup> Institute of Materials Research and Engineering (IMRE), Agency for Science, Technology and Research (A\*STAR), 3 Research Link Singapore 117602. E-mail: [x-li@imre.a-star.edu.sg](mailto:x-li@imre.a-star.edu.sg)

<sup>d</sup> Department of Materials Science & Engineering, National University of Singapore, Blk EA, #03-09, 9 Engineering Drive 1 Singapore 117576.

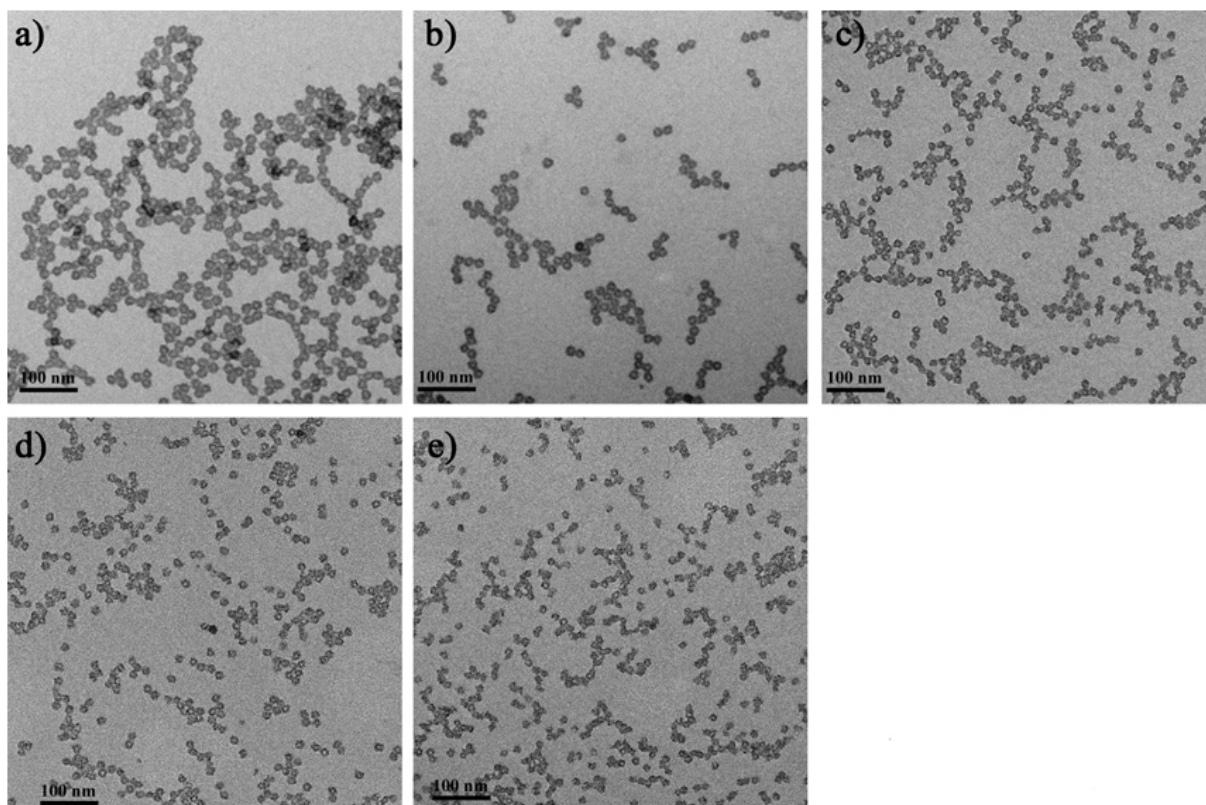

**Fig. S1** TEM images of PEOSN synthesized at various amount of F127 block copolymer: (a) 25 mg, (b) 50 mg, (c) 75 mg, (d) 100 mg and (e) 125 mg.

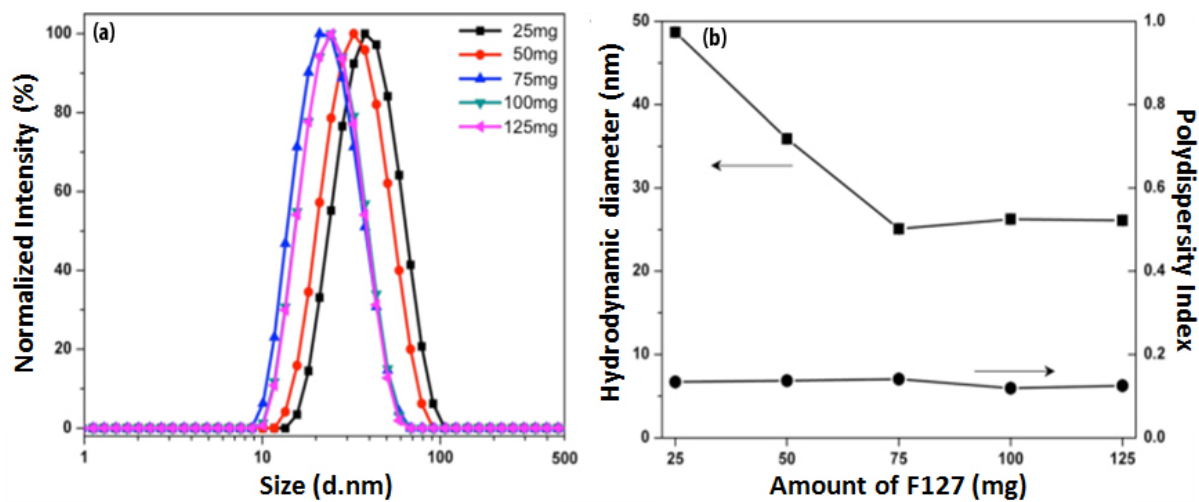

Fig. S2 DLS result of the PEOSN prepared at various amount of F127 block copolymer.

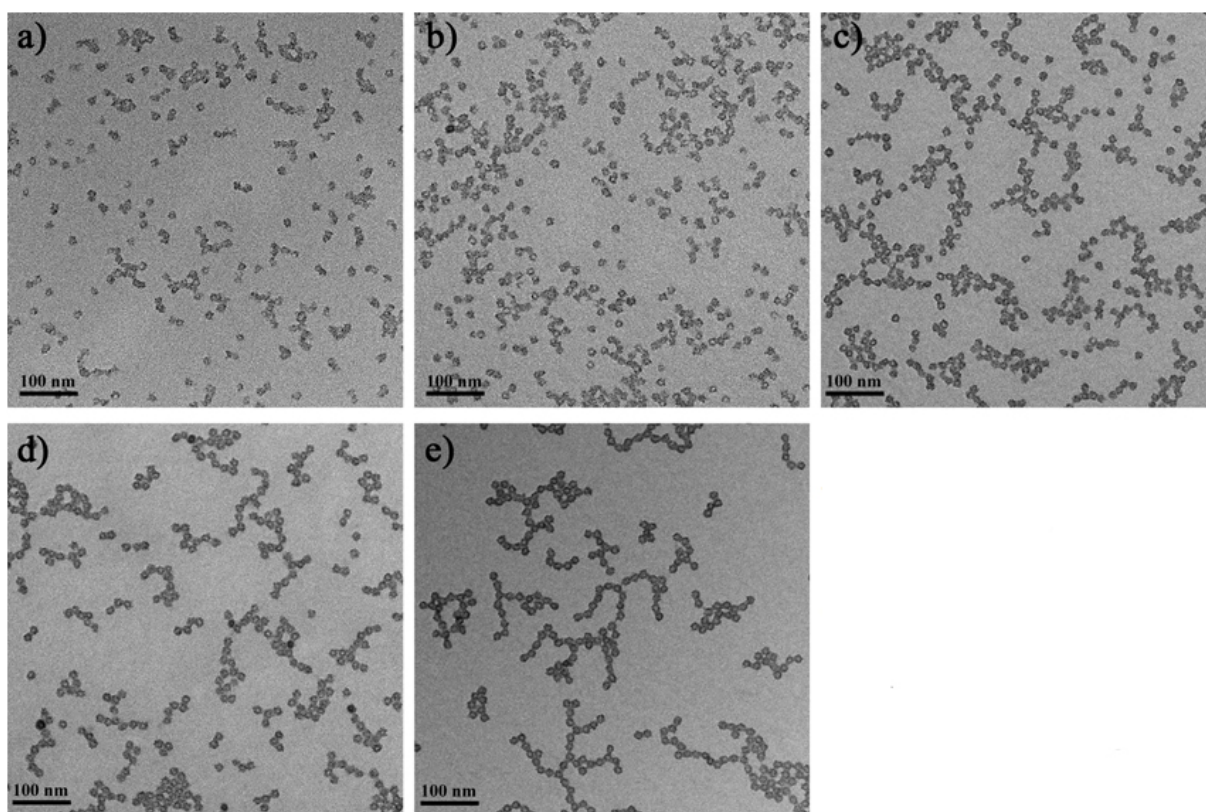

Fig. S3 TEM images of PEOSN synthesized at various amount of TMOS: (a) 25  $\mu$ L, (b) 50  $\mu$ L, (c) 75  $\mu$ L, (d) 100  $\mu$ L and (e) 125  $\mu$ L.

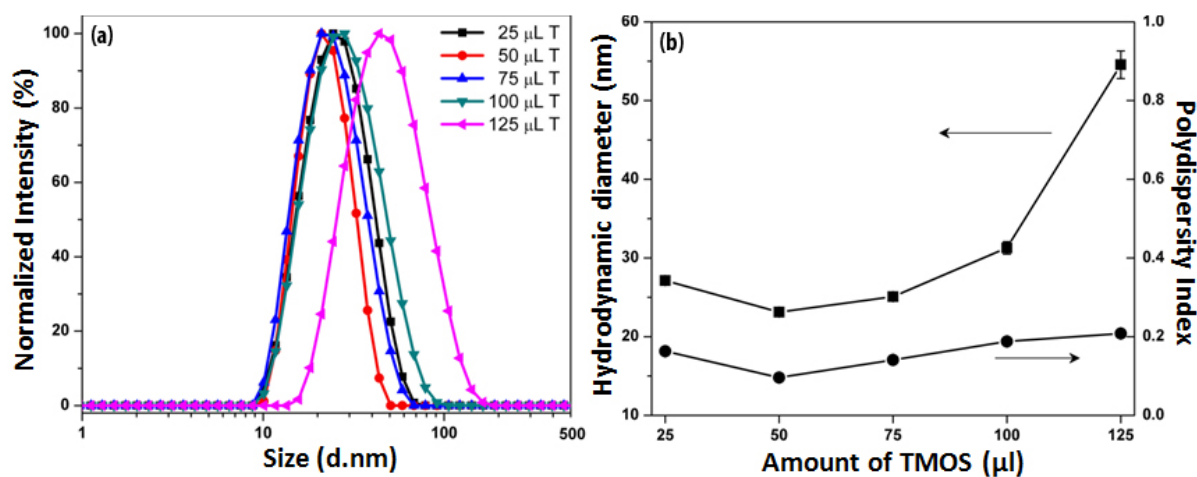

Fig. S4 DLS result of the PEOSN prepared at various amount of TMOS.

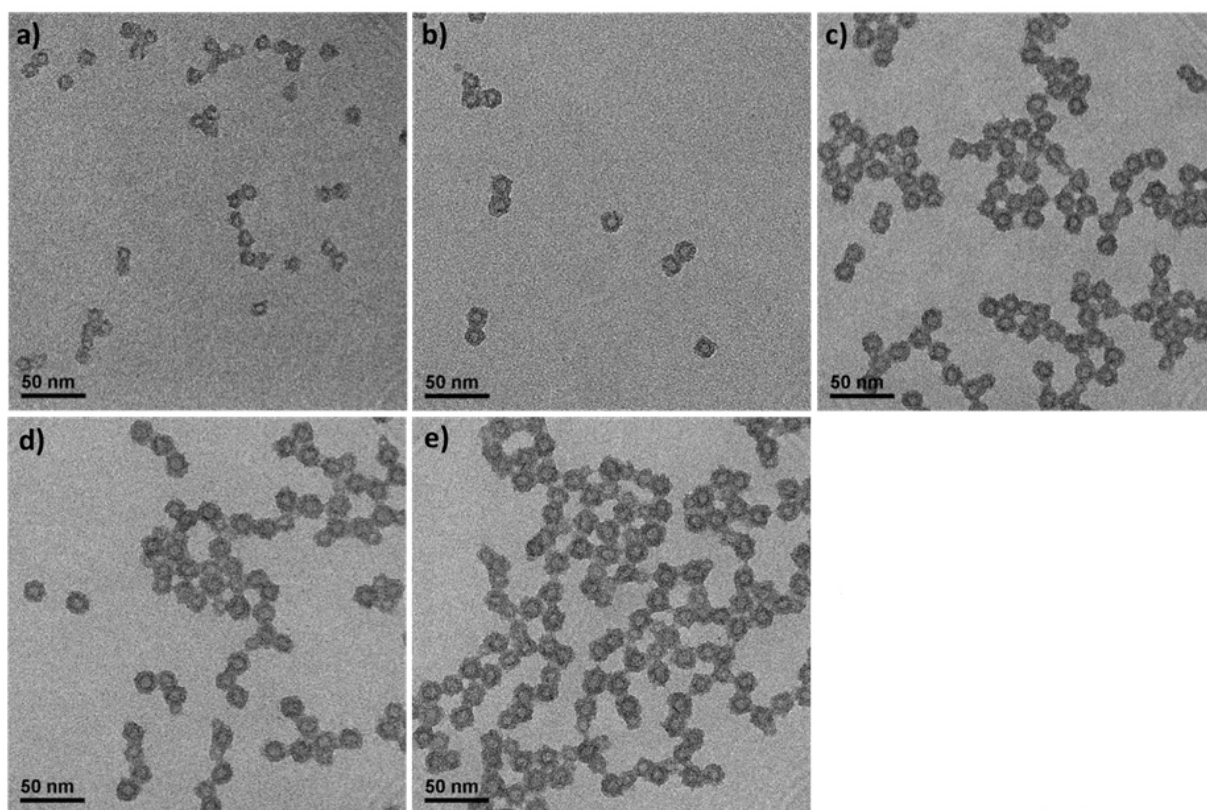

Fig. S5 TEM images of PEOSN synthesized at different mixed solvent ratio (THF/DMF): (a) 1/0, (b) 3/1, (c) 1/1, (d) 1/3, and (e) 0/1.
